# Supplementary material for: A survey of RNA viruses in mosquitoes from Mozambique reveals novel genetic lineages of flaviviruses and phenuiviruses, as well as frequent flavivirus-like viral DNA forms in Mansonia
Source: PubMed Central journal article supplement (PMC7385898; doi:10.1186/s12866-020-01905-5), 2020-07-28

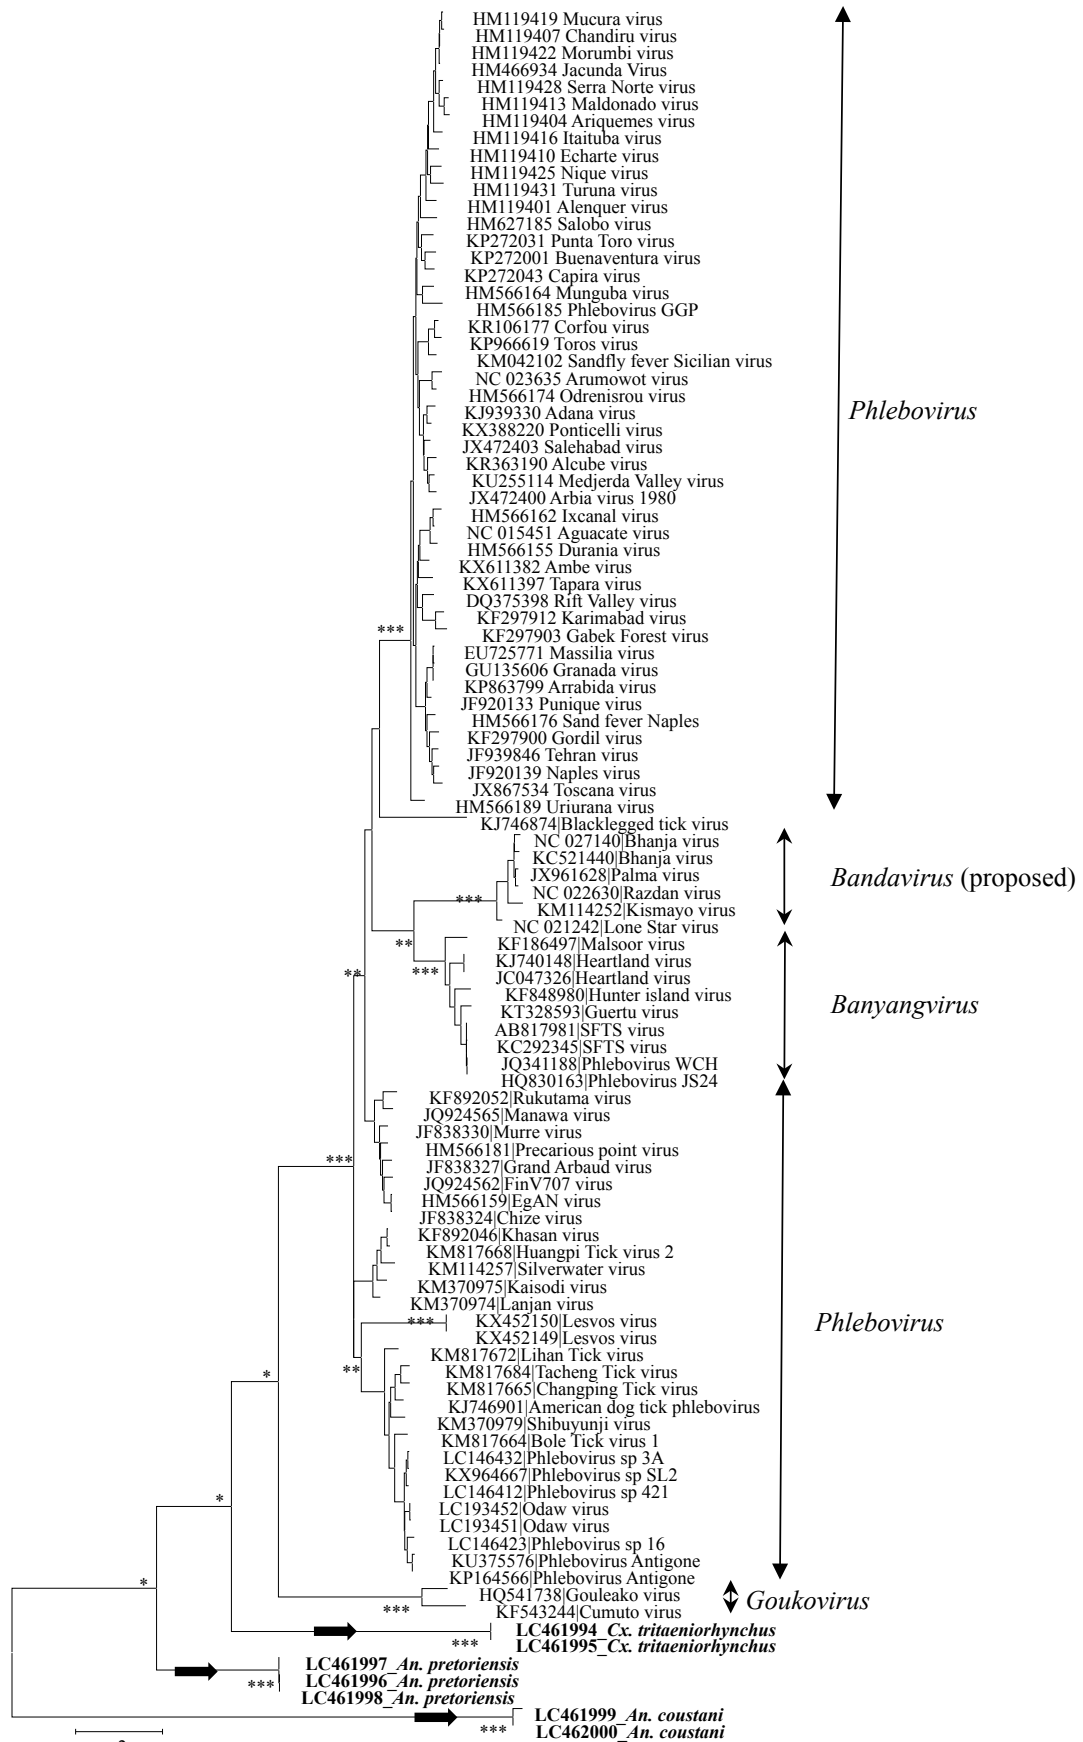

Supplement: 12866_2020_1905_MOESM1_ESM.pdf [file 12866_2020_1905_MOESM1_ESM.pdf]
